# Supplementary material
Source: Research Square preprint supplement (doi:10.21203/rs.3.rs-8067328/v1)
Supplement: Supplementary file 1 [file 53ff6653b15604612a0503a0.docx]

| **Dimensions** | **Coding** | **Items** | **Sources** |
| --- | --- | --- | --- |
| Entertainment | EN1 | I watch unboxing video to combat baredom. | Park et al. ([2009](#_ENREF_39)); Lee and Ma ([2012](#_ENREF_28)); Hur et al. ([2017](#_ENREF_23)) |
| EN2 | I watch unboxing video because it helps me pass time. |
| EN3 | I watch unboxing video because it is entertaining. |
| EN4 | I watch unboxing video because it is funny. |
| EN5 | I watch unboxing video because it relaxes me. |
| Boredom/habitual pass time | BH1 | I follow unboxing video out of habit. | Croes and Bartels ([2021](#_ENREF_10)) |
| BH2 | I follow unboxing video because sometimes I have nothing better to do. |
| BH3 | I follow unboxing video for passing time, especially when I'm bored. |
| Perceived information overload | PIO1 | It takes too much effort to manage my subscribed unboxing video channel list. | Misra and Stokols ([2012](#_ENREF_30)); Chung et al. ([2023](#_ENREF_9)) |
| PIO2 | I often feel overwhelmed by the number of unboxing video recommendation notifications I receive on short-form video platforms. |
| PIO3 | Sorting through all the unboxing video content on short-form video platforms takes up too much of my time. |
| PIO4 | I receive too many unboxing video recommendations on the platform, which affects my viewing experience. |
| Short-form video fatigue | SVF1 | I am not interested in all the new things that are happening on short-form video platforms. | Bright et al. ([2015](#_ENREF_3)); Chung et al. ([2023](#_ENREF_9)) |
| SVF2 | After using short-form video applications, I feel tired or listless. |
| SVF3 | Short-form video applications make me feel very frustrated. |
| SVF4 | After using short-form video applications, I feel extremely irritable. |
| Perceived psychological risk | PPR1 | Watching box unboxing videos makes me feel psychologically uncomfortable. | Mvondo et al. ([2023](#_ENREF_32)) |
| PPR2 | Watching box unboxing videos gives me a feeling of unwanted anxiety. |
| PPR3 | Watching box unboxing videos causes me to experience unnecessary tension. |
| Perceived uncertainty | PU1 | When watching box unboxing videos, I feel unsure whether the items shown are completely consistent with my expectations. | Zhang et al. ([2022](https://doi.org/10.3389/fnbeh.2022.946337)) |
| PU2 | When watching box unboxing videos, I find it difficult to be sure whether the goods shown are suitable for me. |
| PU3 | When watching box unboxing videos, I feel unable to judge the real material and quality level of the goods in the box. |
| Discontinuance intention of  Short-form Video Use | ITD1 | In the future, I will reduce the time I spend watching unboxing videos on short-form video applications. | Maier et al. ([2015](#_ENREF_29)); Chung et al. ([2023](#_ENREF_9)) |
| ITD2 | I am planning to take a break from watching unboxing videos for a while, but I might watch them later. |
| ITD3 | I will delete my account on short-form video applications |
| ITD4 | I have found something more valuable than short-form video applications |
| Customer engagement | CE1 | I spend more time on unboxing videos on short-form video platforms. | Wongkitrungrueng and Assarut ([2020](#_ENREF_54)); He et al. ([2024](#_ENREF_19)) |
| CE2 | I would become a fan and a follower of channels that upload unboxing videos. |
| CE3 | I would be likely to try and keep track of new uploads of unboxing videos. |
| CE4 | I am likely to watch new unboxing videos in the near future. |
| CE5 | I am likely to recommend unboxing videos to my friends. |
| CE6 | I encourage friends and relatives to follow unboxing videos. |
| CE7 | In the near future, I will definitely buy products featured in unboxing videos. |
| CE8 | I consider products shown in unboxing videos to be my first choice when making a purchase. |
